# Supplementary material for: Intestinal goblet cells sample and deliver lumenal antigens by regulated endocytic uptake and transcytosis
Source: eLife. 2021 Oct 22;10:e67292. doi: 10.7554/eLife.67292 (PMC8594945; doi:10.7554/eLife.67292)
Supplement: Figure 8—source data 1. [file elife-67292-fig8-data1.xlsx]

## Sheet: Fig. 8B SI villus GAPs
		SI villus GAPs Ctrl								SI villus GAPs CCh								SI villus GAPs EGTA + CCh
0-10		0	0	0	0	0	0	0		0	0	2.43902	0	1.35135	0	0		0	0	0	0	0
10-30		2	20.5128	1.23457	2.94118	3.125	0	0		13.2075	0	7.31707	1.2987	5.40541	0	21.6216		1.66667	0	0	0	0
30-50		18	15.3846	6.17284	23.5294	12.5	7.54717	2.94118		28.3019	19.2982	34.1463	29.8701	35.1351	30.1887	45.9459		5	4.41176	1.69492	0	0
50-70		12	23.0769	12.3457	50	21.875	47.1698	14.7059		26.4151	35.0877	29.2683	28.5714	27.027	28.3019	24.3243		13.3333	1.47059	3.38983	3.125	11.9048
70-90		26	20.5128	19.7531	11.7647	15.625	33.9623	23.5294		16.9811	17.5439	19.5122	23.3766	12.1622	20.7547	0		11.6667	5.88235	8.47458	4.6875	14.2857
90-110		8	5.12821	27.1605	11.7647	18.75	5.66038	14.7059		7.54717	17.5439	4.87805	11.6883	10.8108	15.0943	8.10811		20	14.7059	27.1186	21.875	26.1905
110-130		6	7.69231	16.0494	0	6.25	1.88679	11.7647		5.66038	7.01754	0	3.8961	0	3.77358	0		20	11.7647	23.7288	12.5	20.2381
130-150		14	2.5641	9.87654	0	6.25	1.88679	20.5882		1.88679	1.75439	2.43902	0	4.05405	1.88679	0		13.3333	20.5882	13.5593	10.9375	15.4762
150-170		4	0	3.7037	0	9.375	1.88679	11.7647		0	1.75439	0	1.2987	1.35135	0	0		10	13.2353	8.47458	17.1875	7.14286
170-190		6	5.12821	0	0	6.25	0	0		0	0	0	0	2.7027	0	0		0	13.2353	5.08475	6.25	1.19048
190-210		4	0	2.46914	0	0	0	0		0	0	0	0	0	0	0		1.66667	4.41176	5.08475	9.375	3.57143
210-230		0	0	1.23457	0	0	0	0		0	0	0	0	0	0	0		1.66667	2.94118	1.69492	6.25	0
230-250		0	0	0	0	0	0	0		0	0	0	0	0	0	0		0	2.94118	1.69492	0	0

## Sheet: Fig. 8C SI crypt GAPs
		cSI GAPs ctrl								cSI GAPs cch								cSI GAPS EDTA cch
0-10		0	0	0	0	0	0	0		0	0	0	0	0	0	4		0	0	0	0	0
10-30		4.54545	6.66667	13.3333	13.6364	3.44828	6.81818	16		32.1429	14.2857	16.6667	16.6667	26.8293	25	40		21.4286	16.129	6.66667	8.16327	15.5844
30-50		18.1818	36.6667	16.6667	50	27.5862	43.1818	28		42.8571	17.8571	27.7778	50	31.7073	27.2727	20		30.9524	19.3548	10	22.449	22.0779
50-70		31.8182	13.3333	16.6667	22.7273	34.4828	13.6364	24		14.2857	7.14286	27.7778	11.1111	9.7561	11.3636	28		23.8095	25.8065	13.3333	16.3265	24.6753
70-90		18.1818	10	23.3333	9.09091	20.6897	11.3636	24		7.14286	7.14286	5.55556	11.1111	12.1951	11.3636	4		7.14286	16.129	26.6667	22.449	19.4805
90-110		4.54545	6.66667	20	4.54545	10.3448	18.1818	8		0	14.2857	5.55556	5.55556	7.31707	18.1818	4		7.14286	9.67742	6.66667	12.2449	10.3896
110-130		9.09091	3.33333	10	0	0	2.27273	0		3.57143	14.2857	11.1111	5.55556	7.31707	4.54545	0		4.7619	3.22581	16.6667	10.2041	2.5974
130-150		0	13.3333	0	0	3.44828	4.54545	0		0	17.8571	5.55556	0	2.43902	2.27273	0		4.7619	0	10	4.08163	2.5974
150-170		0	3.33333	0	0	0	0	0		0	7.14286	0	0	2.43902	0	0		0	6.45161	3.33333	2.04082	1.2987
170-190		9.09091	3.33333	0	0	0	0	0		0	0	0	0	0	0	0		0	0	0	0	1.2987
190-210		0	3.33333	0	0	0	0	0		0	0	0	0	0	0	0		0	0	6.66667	2.04082	0

## Sheet: Fig. 8D DC crypt GAPs
		DC crypts GAPs Ctrl								DC crypts GAPs CCh							DC crypts GAPs EGTA + CCh
0-10		0	0	0	0	0	0	0		0	1.69492	4.6875	0	0	2.94118		0	0	0	0	0
10-30		9.80392	10.8108	4.7619	0	2.5	0	9.67742		25.5319	40.678	43.75	29.4118	14.2857	23.5294		7.69231	15.0943	6.89655	14.7059	8.69565
30-50		35.2941	33.7838	42.8571	24.4898	12.5	45	48.3871		34.0426	33.8983	23.4375	47.0588	34.6939	20.5882		15.3846	16.9811	20.6897	29.4118	34.7826
50-70		23.5294	29.7297	30.9524	26.5306	17.5	35	22.5806		25.5319	10.1695	12.5	15.6863	30.6122	26.4706		23.0769	20.7547	20.6897	23.5294	30.4348
70-90		15.6863	13.5135	14.2857	20.4082	27.5	10	12.9032		6.38298	10.1695	4.6875	5.88235	12.2449	17.6471		20	16.9811	22.4138	8.82353	17.3913
90-110		11.7647	5.40541	4.7619	14.2857	25	5	3.22581		4.25532	0	1.5625	1.96078	6.12245	2.94118		15.3846	3.77358	5.17241	5.88235	4.34783
110-130		3.92157	2.7027	0	12.2449	12.5	5	3.22581		2.12766	1.69492	3.125	0	0	5.88235		3.07692	13.2075	5.17241	2.94118	0
130-150		0	2.7027	2.38095	2.04082	0	0	0		2.12766	0	4.6875	0	2.04082	0		3.07692	5.66038	5.17241	2.94118	0
150-170		0	0	0	0	0	0	0		0	0	0	0	0	0		1.53846	1.88679	3.44828	2.94118	0
170-190		0	1.35135	0	0	0	0	0		0	0	1.5625	0	0	0		4.61538	1.88679	1.72414	2.94118	0
190-210		0	0	0	0	2.5	0	0		0	1.69492	0	0	0	0		4.61538	1.88679	3.44828	2.94118	4.34783
210-230		0	0	0	0	0	0	0		0	0	0	0	0	0		1.53846	0	0	0	0
230-250		0	0	0	0	0	0	0		0	0	0	0	0	0		0	0	1.72414	2.94118	0

## Sheet: Fig 8F SI villus non GAPs
		SI villus non GAPs Ctrl								SI villus non GAPs CCh								SI villus EGTA + CCh
0-10		0	0	0	0	0	0	0		0	0	0	0	0	0	0		0	0	0	0	0
10-30		1	0	2.11268	2.06897	0.819672	0.423729	2.31481		0	2.53165	6.25	0.854701	2.38095	7.36842	9.02778		0.452489	3.2967	4.16667	1.49254	1.16279
30-50		2	4.87805	10.5634	1.37931	2.86885	6.35593	11.1111		4.81928	22.7848	5.20833	2.5641	15.873	10	11.8056		3.61991	1.0989	1.38889	2.48756	4.65116
50-70		5.55556	11.5854	24.6479	21.3793	11.4754	12.2881	17.1296		20.4819	29.1139	31.25	9.40171	15.0794	17.3684	9.72222		12.6697	7.14286	6.94444	6.46766	12.2093
70-90		12.963	18.9024	26.0563	14.4828	13.1148	14.4068	16.2037		14.4578	21.519	26.0417	25.641	23.8095	16.3158	21.5278		12.2172	10.989	15.2778	12.4378	15.1163
90-110		17.284	15.8537	17.6056	22.7586	19.2623	21.1864	21.7593		20.4819	8.86076	10.4167	27.3504	19.0476	18.9474	18.75		18.552	10.4396	15.2778	13.4328	23.8372
110-130		12.3457	11.5854	8.4507	14.4828	14.3443	15.678	15.2778		16.8675	13.9241	8.33333	11.9658	6.34921	12.6316	11.1111		14.0271	13.1868	20.8333	17.9104	16.2791
130-150		14.1975	12.8049	6.33803	11.7241	12.7049	13.5593	7.40741		18.0723	1.26582	8.33333	13.6752	3.1746	6.31579	6.25		9.04977	15.3846	19.4444	13.4328	10.4651
150-170		12.963	7.31707	2.8169	4.82759	10.6557	7.62712	4.16667		0	0	3.125	5.12821	6.34921	3.68421	6.94444		6.33484	13.1868	11.1111	8.95522	5.81395
170-190		3.08642	6.70732	1.40845	4.13793	6.55738	2.9661	2.31481		1.20482	0	1.04167	3.4188	4.7619	2.63158	2.08333		8.1448	8.24176	1.38889	8.95522	5.81395
190-210		8.02469	3.65854	0	2.06897	2.86885	2.11864	0.925926		3.61446	0	0	0	3.1746	2.63158	2.08333		1.80995	7.14286	4.16667	3.48259	1.74419
210-230		1.85185	4.26829	0	0.689655	1.63934	2.54237	0.925926		0	0	0	0	0	0.526316	0		4.97738	3.2967	0	5.47264	1.74419
230-250		0.617284	1.82927	0	0	2.86885	0.847458	0.462963		0	0	0	0	0	1.05263	0.694444		3.61991	1.64835	0	1.99005	0.581395

## Sheet: Fig. 8E SI crypt non GAPs
		SI crypt non GAPs Ctrl								SI crypt non GAPS CCh								SI crypt non GAPs EGTA + CCh
0-10		0	0	0	0.613497	0	0	0		0	0	0	1.45985	0	0	4.08163		0	0	0	0	0.900901
10-30		16.2393	11.7241	14.5833	11.6564	10.989	13.3005	10.7914		40	18.6047	33.3333	21.8978	28.8591	19.8068	29.5918		2.5	8.98876	5.47264	6.89655	20.7207
30-50		21.3675	20.6897	29.8611	27.6074	19.7802	26.1084	25.8993		32.5926	39.5349	37.5	32.1168	32.8859	32.8502	32.6531		15.625	21.3483	13.4328	18.2266	23.4234
50-70		16.2393	22.069	23.6111	26.9939	20.8791	18.2266	27.3381		16.2963	24.4186	20.8333	21.1679	12.7517	18.3575	27.551		18.125	23.5955	9.95025	21.6749	24.3243
70-90		17.9487	21.3793	18.0556	18.4049	13.7363	13.3005	19.4245		7.40741	9.30233	6.94444	10.9489	14.7651	14.9758	4.08163		18.125	17.9775	19.403	11.8227	15.3153
90-110		16.2393	11.0345	9.02778	7.36196	12.0879	10.3448	8.63309		1.48148	3.48837	1.38889	6.56934	7.38255	5.31401	2.04082		15.625	13.4831	10.4478	16.2562	8.10811
110-130		4.2735	4.82759	4.16667	3.68098	7.69231	5.91133	3.59712		1.48148	3.48837	0	4.37956	0.671141	5.31401	0		13.125	8.98876	12.4378	9.35961	3.6036
130-150		3.4188	5.51724	0.694444	1.84049	5.49451	6.89655	2.8777		0.740741	0	0	0	0.671141	0.966184	0		9.375	3.37079	8.95522	6.89655	2.7027
150-170		1.7094	1.37931	0	0.613497	2.74725	1.47783	0		0	0	0	1.45985	1.34228	0.966184	0		2.5	1.1236	10.9453	4.4335	0.900901
170-190		0.854701	0.689655	0	0.613497	2.74725	0.985222	0.719424		0	1.16279	0	0	0	0.483092	0		3.75	1.1236	3.9801	3.44828	0
190-210		1.7094	0	0	0.613497	2.74725	2.95567	0.719424		0	0	0	0	0.671141	0.483092	0		1.25	0	2.98507	0.492611	0

## Sheet: Fig. 8F DC non GAPs
	DC crypt non GAPs Ctrl								DC crypt non GAPs CCh							DC crypt non GAPs EGTA + CCh
0-10	0	0	0	0	0.512821	0	0		0	0	0	0	0	0		0	0	0	0	0
10-30	9.31373	9.78261	6.81818	1.86916	8.71795	8.49057	2.94118		7.32984	1.05263	2.17391	4.43038	7.76699	7.89474		7.05128	8.33333	4.34783	3.42466	2.64901
30-50	14.2157	16.3043	12.2727	8.41121	15.8974	9.43396	11.7647		11.5183	13.6842	13.7681	14.557	7.76699	15.7895		8.97436	16.1111	16.8478	11.6438	8.60927
50-70	14.2157	13.587	13.1818	14.9533	21.5385	10.3774	25		16.2304	9.47368	18.8406	16.4557	14.5631	16.3158		13.4615	14.4444	19.0217	19.1781	17.8808
70-90	20.5882	15.7609	10.9091	14.9533	9.74359	13.2075	25		19.8953	16.3158	18.1159	13.2911	14.5631	18.4211		12.1795	19.4444	14.1304	15.0685	17.8808
90-110	15.6863	15.7609	14.0909	19.6262	12.3077	7.54717	7.35294		14.6597	14.2105	13.7681	17.0886	11.6505	11.0526		15.3846	15	8.69565	7.53425	13.9073
110-130	9.31373	10.8696	6.36364	13.0841	12.3077	10.3774	2.94118		9.94764	12.6316	12.3188	18.3544	11.6505	10		10.8974	12.7778	11.413	11.6438	15.2318
130-150	6.37255	5.97826	8.63636	12.1495	6.66667	12.2642	7.35294		6.28272	7.89474	10.8696	8.86076	7.28155	10.5263		4.48718	4.44444	5.97826	6.84932	6.62252
150-170	5.39216	2.71739	9.09091	8.41121	7.17949	7.54717	7.35294		5.75916	5.78947	5.7971	4.43038	8.25243	6.31579		8.33333	3.33333	5.97826	5.47945	9.27152
170-190	2.94118	4.8913	3.63636	1.86916	1.02564	5.18868	5.88235		4.71204	5.26316	2.89855	1.89873	5.33981	2.63158		6.41026	3.88889	5.43478	6.84932	3.97351
190-210	0.980392	2.17391	7.27273	1.86916	2.05128	3.30189	1.47059		1.04712	6.31579	1.44928	0.632911	4.85437	0.526316		1.92308	1.11111	2.71739	3.42466	1.3245
210-230	0.490196	0.543478	4.09091	1.86916	1.02564	1.88679	2.94118		1.57068	4.21053	0	0	1.94175	0		4.48718	0.555556	2.17391	3.42466	0.662252
230-250	0.490196	0.543478	1.36364	0	0.512821	3.30189	0		1.04712	2.10526	0	0	2.91262	0.526316		2.5641	0.555556	0.543478	0.684932	0.662252
